# Supplementary material for: The Effect of the Gallbladder Environment during Chronic Infection on Salmonella Persister Cell Formation
Source: MDPI journal article supplement (doi:10.3390/microorganisms10112276), 2022-11-16
Supplement: s1 [file s1]

**Supplementary Table S1.** Strains used in this study.

Supplementary Table S1. Strains used in this study.

| Laboratory strains |                                               |                |                   |                                         | MIC (µg/mL) |     |
|--------------------|-----------------------------------------------|----------------|-------------------|-----------------------------------------|-------------|-----|
| Strain             | Characteristics                               |                |                   | Source                                  | Cipro       | Kan |
| JSG4383            | <i>S. Typhi</i> Ty2; <i>rpos</i> <sup>+</sup> |                |                   | Gift of Roy Curtis                      | 0.5         | 24  |
| JSG210             | <i>S. Typhimurium</i> 14028                   |                |                   | ATCC                                    | 0.125       | 24  |
| Clinical Isolates  |                                               |                |                   |                                         |             |     |
| Strain             | Isolation source/characteristics              | Infection type | Country of origin | Source                                  |             |     |
| JSG3074            | Gallstone                                     | Chronic        | Mexico            | General Hospital of Mexico, Mexico City | 2           | 32  |
| JSG3076            | Gallstone                                     | Chronic        | Mexico            | General Hospital of Mexico, Mexico City | 2           | 16  |
| JSG3400            | Bile                                          | Acute          | USA               | Ohio Department of Health               | 2           | 64  |
| JSG3441            | Stool                                         | Acute          | USA               | Ohio Department of Health               | 2           | 64  |
| JSG3979            | Gallbladder                                   | Chronic        | Vietnam           | Gift of S. Baker                        | 2           | 32  |
| JSG3981            | Gallbladder                                   | Chronic        | Vietnam           | Gift of S. Baker                        | 2           | 16  |
